# Supplementary material for: In type 2 diabetes, randomisation to advice to follow a low-carbohydrate diet transiently improves glycaemic control compared with advice to follow a low-fat diet producing a similar weight loss
Source: Springer Nature journal article supplement (doi:10.1007/s00125-012-2567-4), 2012-05-05
Supplement: MOESM1 [file 8090866]

## Electronic supplementary material

**Table 1**

Anthropometrics, metabolic outcomes and medication at 0, 6, 12 and 24 months after the initiation in patients with type 2 diabetes randomised to a low-fat or low-carbohydrate diet and had followed the fat-restriction:  $\leq 35$  energy % for low-fat group (n= 20),  $\geq 45$  energy % for low-carbohydrate group (n= 12) at the 24 month registration.

| Variable                         | Diet      | Time point          |                             |                      |                             |                      |                             |                      |                             |                             |                             |
|----------------------------------|-----------|---------------------|-----------------------------|----------------------|-----------------------------|----------------------|-----------------------------|----------------------|-----------------------------|-----------------------------|-----------------------------|
|                                  |           | 0 months            |                             | 6 months             |                             | 12 months            |                             | 24 months            |                             |                             |                             |
|                                  |           |                     | <i>P</i> value <sup>a</sup> |                      | <i>P</i> value <sup>b</sup> |                      | <i>P</i> value <sup>b</sup> |                      | <i>P</i> value <sup>b</sup> | <i>P</i> value <sup>c</sup> | <i>P</i> value <sup>d</sup> |
| Weight (kg)                      | Low-fat   | 98.4±19             | 0.061                       | 93.8±19              | <0.001                      | 94.5±18              | 0.002                       | 94.9±19              | 0.001                       | <0.001                      | 0.096                       |
|                                  | Low-carb. | 85.0±18             |                             | 80.1±16              | <0.001                      | 82.8±17              | 0.001                       | 82.0±18              | 0.018                       | <0.001                      |                             |
| BMI (kg/m <sup>2</sup> )         | Low-fat   | 34.8±5.6            | 0.040                       | 33.1±5.2             | <0.001                      | 33.4±5.0             | 0.002                       | 33.5±5.6             | 0.001                       | <0.001                      | 0.053                       |
|                                  | Low-carb. | 30.4±5.4            |                             | 28.7±4.9             | <0.001                      | 29.3±5.4             | 0.001                       | 29.3±5.4             | 0.016                       | <0.001                      |                             |
| Waist (cm)                       | Low-fat   | 111±12              | 0.033                       | 107±13               | 0.001                       | 107±12               | <0.001                      | 108±14               | 0.011                       | <0.001                      | 0.072                       |
|                                  | Low-carb. | 102±13              |                             | 98±11                | 0.002                       | 97±11                | 0.003                       | 100±13               | 0.022                       | <0.001                      |                             |
| Sagittal abdominal diameter (cm) | Low-fat   | 27±5                | 0.11                        | 27±4                 | 0.24                        | 27±4                 | 0.27                        | 27±4                 | 0.98                        | 0.40                        | 0.010                       |
|                                  | Low-carb. | 25±4                |                             | 23±3                 | 0.008                       | 23±3                 | 0.006                       | 23±4                 | 0.013                       | 0.003                       |                             |
| HbA1c (%)<br>(mmol/mol)          | Low-fat   | 7.1±2.9<br>54.5±8.0 | 0.28                        | 7.0±3.0<br>52.9±9.7  | 0.35                        | 6.9±3.0<br>52.3±9.1  | 0.16                        | 7.4±3.2<br>56.9±11.1 | 0.22                        | 0.021                       | 0.77                        |
|                                  | Low-carb. | 7.4±2.7<br>57.5±6.4 |                             | 6.9±3.1<br>51.6±10.0 | 0.034                       | 7.1±3.2<br>54.5±11.3 | 0.16                        | 7.3±2.8<br>56.5±7.4  | 0.65                        | 0.14                        |                             |
| Systolic blood pressure (mmHg)   | Low-fat   | 137±13              | 0.065                       | 127±14               | 0.006                       | 125±10               | 0.001                       | 125±15               | 0.001                       | 0.001                       | 0.11                        |
|                                  | Low-carb. | 128±14              |                             | 122±16               | 0.22                        | 125±12 <sup>f</sup>  | 0.29                        | 122±13               | 0.44                        | 0.51                        |                             |
| Diastolic blood pressure (mmHg)  | Low-fat   | 78±8                | 0.054                       | 75±7                 | 0.065                       | 67±9                 | <0.001                      | 72±11                | 0.014                       | <0.001                      | 0.34                        |
|                                  | Low-carb. | 71±13               |                             | 70±9                 | 0.72                        | 70±11 <sup>f</sup>   | 0.57                        | 68±6                 | 0.20                        | 0.39                        |                             |

|                            |           |           |       |           |               |           |               |                        |               |               |       |
|----------------------------|-----------|-----------|-------|-----------|---------------|-----------|---------------|------------------------|---------------|---------------|-------|
| Total cholesterol (mmol/l) | Low-fat   | 4.2±0.9   | 0.59  | 4.2±1.0   | 0.78          | 4.3±1.1   | 0.31          | 4.0±0.9                | 0.44          | 0.46          | 0.86  |
|                            | Low-carb. | 4.0±0.9   |       | 4.1±1.2   | 0.59          | 4.2±0.8   | 0.38          | 4.2±1.0                | 0.38          | 0.79          |       |
| LDL-cholesterol (mmol/l)   | Low-fat   | 2.3±0.6   | 0.89  | 2.4±0.8   | 0.63          | 2.4±0.8   | 0.70          | 2.1±0.7                | 0.13          | 0.18          | 0.89  |
|                            | Low-carb. | 2.3±0.8   |       | 2.3±0.9   | 0.96          | 2.3±0.6   | 0.77          | 2.2±0.7                | 0.39          | 0.67          |       |
| HDL-cholesterol (mmol/l)   | Low-fat   | 1.05±0.26 | 0.63  | 1.09±0.29 | 0.10          | 1.16±0.22 | 0.005         | 1.17±0.25              | 0.003         | 0.006         | 0.18  |
|                            | Low-carb. | 1.11±0.36 |       | 1.33±0.57 | 0.035         | 1.29±0.47 | 0.059         | 1.46±0.59 <sup>f</sup> | 0.007         | 0.001         |       |
| Triglycerides (mmol/l)     | Low-fat   | 1.7±0.8   | 0.091 | 1.6±0.7   | 0.30          | 1.7±0.9   | 0.98          | 1.6±0.7                | 0.39          | 0.53          | 0.060 |
|                            | Low-carb. | 1.3±0.6   |       | 1.1±0.4   | 0.094         | 1.2±0.4   | 0.39          | 1.3±0.8                | 0.84          | 0.37          |       |
| Total insulin dose (E)     | Low-fat   | 35±56     | 0.11  | 32±52     | 0.17          | 33±51     | 0.34          | 35±50                  | 0.89          | 0.68          | 0.10  |
|                            | Low-carb. | 8±17      |       | 6±13      | 0.17          | 7±14      | 0.73          | 10±23                  | 0.63          | 0.49          |       |
| Metformin (mg)             | Low-fat   | 1425±936  | 0.44  | 1175±878  | 0.056         | 1300±865  | 0.17          | 1200±894               | 0.095         | 0.063         | 0.91  |
|                            | Low-carb. | 1167±862  |       | 1417±793  | 0.053         | 1208±891  | 0.86          | 1167±862               | 1.0           | 0.83          |       |
| Glibenclamide (mg)         | Low-fat   | 0.5±2.3   | 0.12  | 0.4±1.6   | 0.33          | 0.4±1.6   | 0.67          | 0.4±1.6                | 0.67          | 0.69          | 0.43  |
|                            | Low-carb. | 2.2±3.6   |       | 0.7±1.4   | 0.054         | 0.4±1.1   | 0.082         | 0.4±1.0                | 0.099         | 0.036         |       |
| Simvastatin (mg)           | Low-fat   | 24±18     | 0.43  | 24±18     | <sup>-e</sup> | 26±17     | 0.33          | 26±17                  | 0.33          | 0.40          | 0.14  |
|                            | Low-carb. | 29±17     |       | 33±14     | 0.34          | 38±19     | 0.096         | 38±19                  | 0.096         | 0.073         |       |
| Atorvastatin (mg)          | Low-fat   | 1±4       | 0.45  | 1±4       | <sup>-e</sup> | 2±9       | 0.33          | 2±9                    | 0.33          | 0.33          | 0.45  |
|                            | Low-carb. | 0±0       |       | 0±0       | <sup>-e</sup> | 0±0       | <sup>-e</sup> | 0±0                    | <sup>-e</sup> | <sup>-e</sup> |       |

Abbreviations: BMI, body-mass-index; Carb., carbohydrate.

<sup>a</sup>Between groups at baseline

<sup>b</sup>For change compared with baseline

<sup>c</sup>For change over all time points

<sup>d</sup>For change over all time points between groups

<sup>e</sup>As there were no changes in simvastatin doses, the *t* test is not applicable

<sup>f</sup>Statistical significant change between groups at this time point
